# Supplementary material
Source: PubMed Central journal article supplement (PMC5738662)
Supplement: BPH-173-3292-s001.pdf [file BPH-173-3292-s001.pdf]

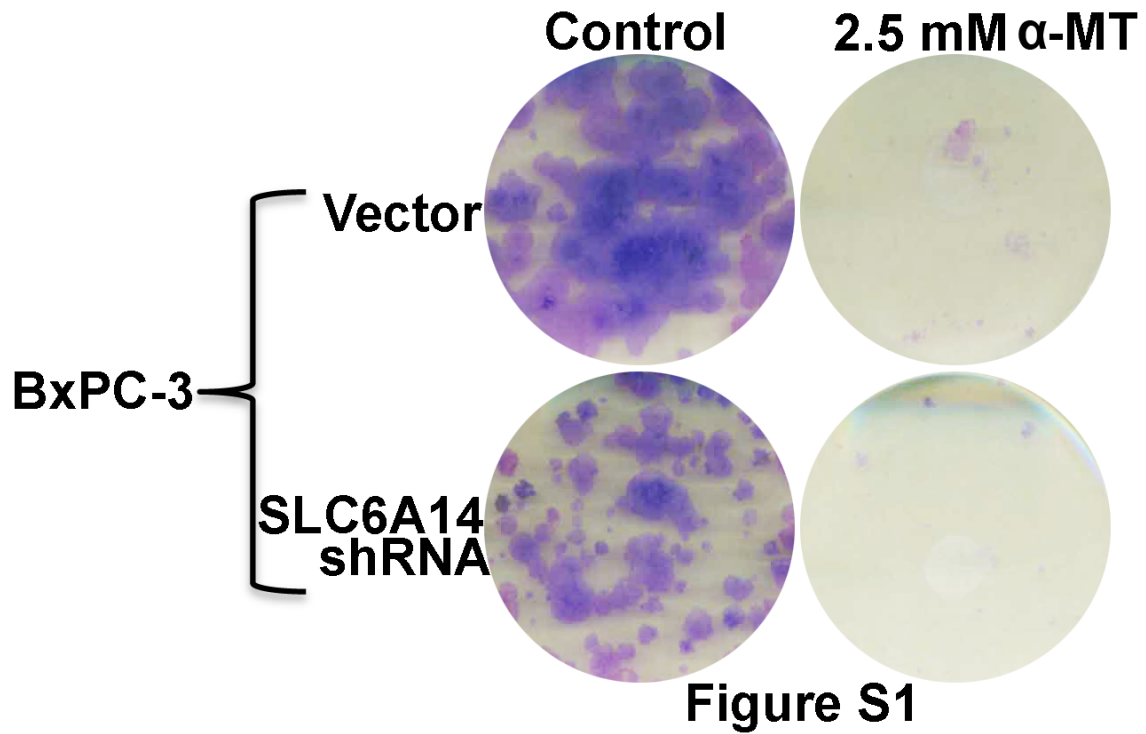

**Figure S1 Genetic knockdown of SLC6A14 by shRNA reduces the colony formation capacity of pancreatic cancer cells.** The figure shows the colony formation ability in BxPC-3/Vector control and BxPC-3/SLC6A14-shRNA cells. Also shown is the effect of 2.5 mM  $\alpha$ -MT on the vector control and SLC6A14-silenced BxPC-3 cells.

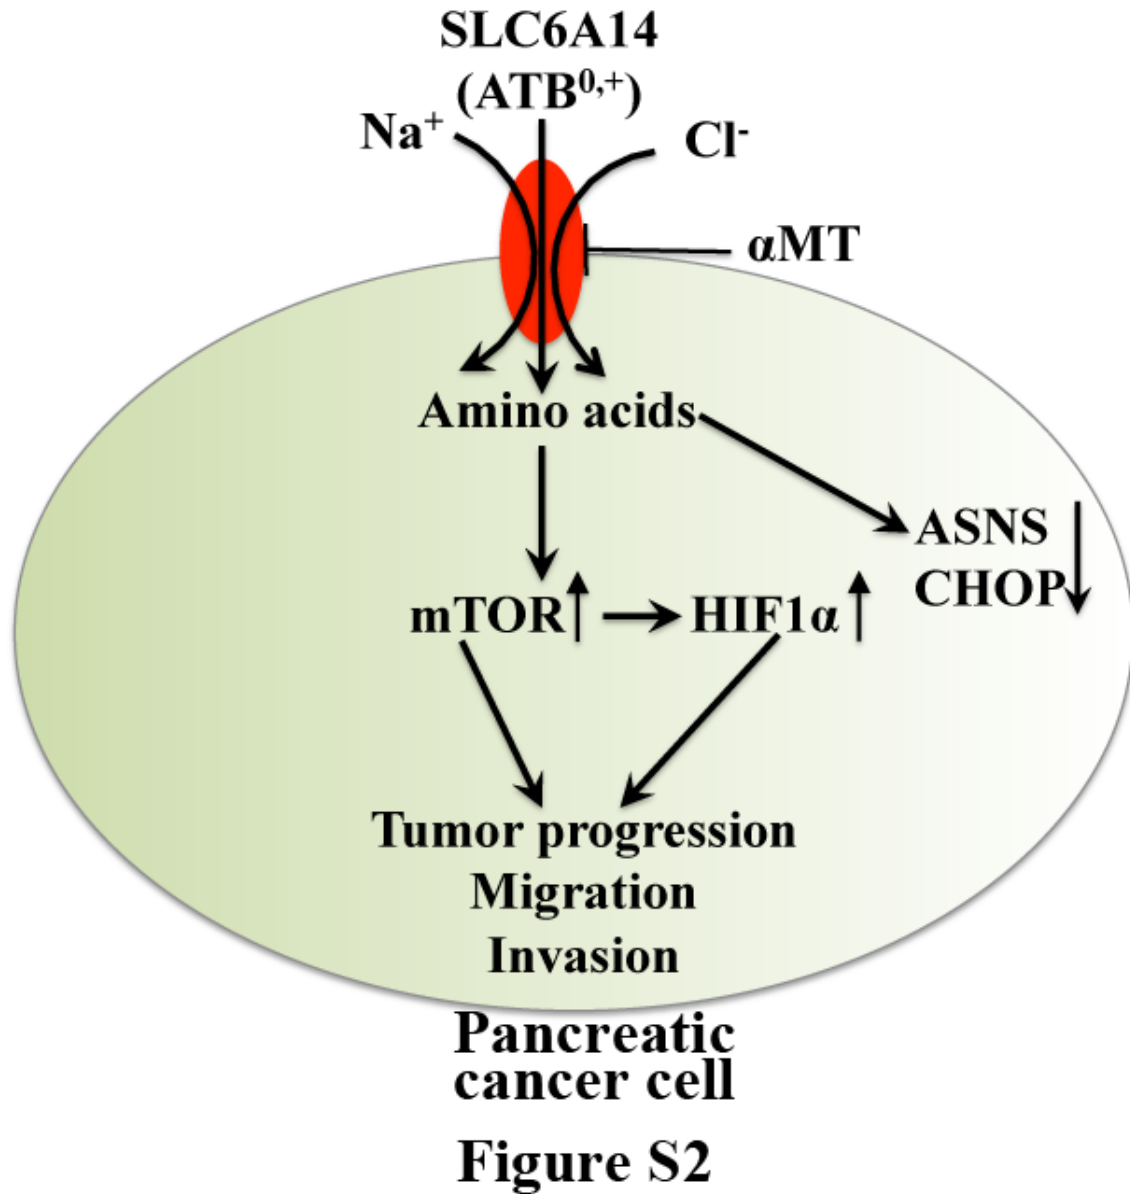

**Figure S2** Schematic model showing how amino acid entry via SLC6A14 promotes tumor growth and migration/invasion and the consequences of the blockade of the transporter function with  $\alpha$ -MT.
